# Supplementary material for: System analysis of gene mutations and clinical phenotype in Chinese patients with autosomal-dominant polycystic kidney disease
Source: PubMed Central journal article supplement (PMC5080601; doi:10.1038/srep35945), 2016-10-26
Supplement: srep35945-s1.pdf [file srep35945-s1.pdf]

**System analysis of gene mutations and clinical phenotype in Chinese patients  
with autosomal-dominant polycystic kidney disease**

Meiling Jin, MS<sup>1,2,#</sup>, Yuansheng Xie, MD, PhD<sup>1,##</sup>, Zhiqiang Chen, MS<sup>3</sup>, Yujie Liao, MD, PhD<sup>4</sup>,  
Zuoxiang Li, MS<sup>1</sup>, Panpan Hu, MS<sup>1,5</sup>, Yan Qi, MB<sup>1</sup>, Zhiwei Yin, PhD<sup>1</sup>, Qinggang Li, MD, PhD<sup>1</sup>,  
Ping Fu, MD<sup>4</sup>, Xiangmei Chen, MD, PhD<sup>1,\*</sup>

<sup>1</sup> Department of Nephrology, Chinese PLA General Hospital, Chinese PLA Institute of  
Nephrology,

State Key Laboratory of Kidney Diseases, National Clinical Research Center for Kidney Diseases,

<sup>2</sup> Medical College, Nankai University, Tianjin, China

<sup>3</sup> BGI-Shenzhen, Shenzhen, China

<sup>4</sup> Department of Nephrology, West China Hospital of Sichuan University, Chengdu, Sichuan,  
China.

<sup>5</sup> Department of Nephrology, Civil Aviation General Hospital, Beijing, China

# Contributed equally

\* Co-Corresponding author

**Supplementary Methods**

**Targeted next-generation sequencing and mutation identification**

Approximately 5 ml of peripheral blood was obtained from the participants using an EDTA anticoagulation tube and sodium citrate anticoagulation tube. The DNA was extracted from leukocytes using standard methods and stored at -80 °C.

A custom capture array (NimbleGen, Roche) was designed to capture the exons, splice sites

and the immediately adjacent intron sequences of targeted genes (PKD1 and PKD2). The qualified genomic DNA sample was then fragmented using AFA (Adaptive Focused Acoustics™) technology on Covaris S220 Focused-ultrasonicators, and the sizes of the library fragments were primarily distributed between 250 bp and 300 bp. Adapters were then ligated to both ends of the resulting fragments. Extracted DNA was then amplified by ligation-mediated PCR (LM-PCR), purified, and hybridized to the Nimblegen SeqCap EZ Library for enrichment; non-hybridized fragments were then washed out. Both non-captured and captured LM-PCR products were subjected to quantitative PCR to estimate the magnitude of enrichment. Each captured library was then loaded on a HiSeq2000 platform, and we performed high-throughput sequencing for each captured library to ensure that each sample met the desired average sequencing depth. Raw image files were processed using the Illumina basecalling Software 1.7 for base-calling with default parameters, and the sequences of each individual were generated as 90 bp pair-end reads. SOAPaligner/SOAP2 was used to map reads onto the reference, whereas BWA was used to map reads to the reference when analysing indels. The information of BWA can be found at <http://bio-bwa.sourceforge.net/>. The variations identified with NGS were validated by using classic Sanger sequencing. The standard nomenclature recommended by HGVS (<http://www.hgvs.org/mutnomen/>) was used to name the variations in this study(1).

Common polymorphisms were filtered out by comparison with databases. We used dbSNP 137, the 1000 genome database, the 1000 genome (1092) database, the Exon Sequencing Project database (<http://evs.gs.washington.edu>), an in-house exome variant dataset, the HapMap database, the PVFD database (variant frequency in normal population database), and YINXIE and YH databases, which are based on the Chinese population, to filter out both common benign variants

and recurrent artefact variant calls. All detected variants were compared to gene mutation databases (The Human Gene Mutation Database [HGMD], <http://www.hgmd.cf.ac.uk> and ADPKD Database [PKDB], <http://pkdb.mayo.edu>).

### **Pathogenic mutation conformation**

Mutations identified in the current study were categorized into three classes: definite pathogenic mutation, probable pathogenic mutations and indeterminate mutation. The definite pathogenic mutations referred to nonsense mutations, frameshift deletions, insertions or indels, typical splicing mutations, or in-frame changes of  $\geq 5$  amino acids. According to a previous study, the probably pathogenic mutations referred primarily to missense mutations with a combined a core of  $\geq 14$  (see below)(2). The indeterminate mutations referred to the remaining mutations.

The potential pathogenicity of the identified missense variants was evaluated by combining different methods: the Grantham matrix scoring system Align Grantham Variation Grantham Deviation (Align-GVGD) ([http:// agvgd.iarc.fr/](http://agvgd.iarc.fr/))(3), PolyPhen-2 (Polymorphism Phenotyping v2; <http://genetics.bwh.harvard.edu/pph/>)(4), Sorting Intolerant from Tolerant (SIFT) (<http://sift.jcvi.org/>)(5), and Mutation Taster(6). Based on the results of these analyses, each of the identified missense variations was scored as follows: (1) A Grantham distance  $<60$  corresponded to a score of 0, and a Grantham distance  $> 60$  corresponded to a score of 2; (2) using A-GVGD, a score from 0 to 6 was assigned for C0 to C65; (3) a PolyPhen score of 0, 2, or 4 was assigned to benign, possibly damaging or probably damaging variations, respectively; (4) using SIFT and Mutation Taster, a score of 0 or 4 was assigned to tolerated or non-tolerated, disease-causing changes, respectively.

Potential splice-site effects were evaluated using Splice Site Prediction based on Neural

Network and Human Splice Finder software. Variations that were predicted to affect splicing by both methods were considered to be “definite pathogenic mutations”. Variations that were predicted to affect splicing by only one of these software applications were considered to be a “probably pathogenic mutation”. A variation that was predicted to have no effect on splicing by both software applications was considered to be “indeterminate mutation”.

## Reference

1. den Dunnen, JT, Antonarakis, SE: Mutation nomenclature extensions and suggestions to describe complex mutations: a discussion. *Hum Mutat* 15: 7-12, 2000
2. Audrezet, MP, Cornec-Le Gall, E, Chen, JM, Redon, S, Quere, I, Creff, J, Benech, C, Maestri, S, Le Meur, Y, Ferec, C: Autosomal dominant polycystic kidney disease: comprehensive mutation analysis of PKD1 and PKD2 in 700 unrelated patients. *Hum Mutat* 33: 1239-1250, 2012
3. Mathe, E, Olivier, M, Kato, S, Ishioka, C, Hainaut, P, Tavtigian, SV: Computational approaches for predicting the biological effect of p53 missense mutations: a comparison of three sequence analysis based methods. *Nucleic Acids Res* 34: 1317-1325, 2006
4. Adzhubei, IA, Schmidt, S, Peshkin, L, Ramensky, VE, Gerasimova, A, Bork, P, Kondrashov, AS, Sunyaev, SR: A method and server for predicting damaging missense mutations. *Nat Methods* 7: 248-249, 2010
5. Ng, PC, Henikoff, S: Predicting deleterious amino acid substitutions. *Genome Res* 11: 863-874, 2001
6. Schwarz, JM, Rodelsperger, C, Schuelke, M, Seelow, D: MutationTaster evaluates disease-causing potential of sequence alterations. *Nat Methods* 7: 575-576, 2010

## Supplementary Tables

**Supplementary Table 1. Average sequencing quality control and coverage statistics of targeted sequencing**

| <b>Exome Capture Statistics</b>                       | <b>Average</b> | <b>SD</b>  |
|-------------------------------------------------------|----------------|------------|
| Target region (bp)(1)                                 | 12831.00       | 0.000      |
| Raw reads                                             | 1158866.00     | 181017.199 |
| Raw data yield (Mb)                                   | 104.30         | 16.371     |
| Reads mapped to genome                                | 368578.80      | 43045.447  |
| Reads mapped to target region(2)                      | 26046.40       | 3235.389   |
| Data mapped to target region (Mb)                     | 1.6930         | 0.21045    |
| Mean depth of target region(X)                        | 131.9000       | 16.39786   |
| Coverage of target region (%)                         | 98.9920        | 0.36408    |
| Average read length (bp)                              | 89.894         | 0.0052     |
| Rate of nucleotide mismatch (%)                       | .3290          | 0.01197    |
| Fraction of target covered $\geq 4X$ (%)              | 98.2850        | 0.25136    |
| Fraction of target covered $\geq 10X$ (%)             | 97.1650        | 0.44373    |
| Fraction of target covered $\geq 20X$ (%)             | 94.8980        | 0.48207    |
| Capture specificity (%) (3)                           | 9.3060         | 0.43095    |
| Reads mapped to flanking region(4)                    | 18045.30       | 2219.362   |
| Mean depth of flanking region(X)                      | 116.2910       | 14.38044   |
| Coverage of flanking region (%)                       | 97.9120        | 0.58596    |
| Fraction of flanking covered $\geq 4X$ (%)            | 95.9510        | 0.47400    |
| Fraction of flanking covered $\geq 10X$ (%)           | 93.6750        | 0.47924    |
| Fraction of flanking covered $\geq 20X$ (%)           | 91.9120        | 0.35131    |
| Fraction of unique mapped bases on or near target (%) | 14.5700        | 0.65955    |
| Duplication rate (%) (5)                              | 8.0550         | 0.20018    |
| GC rate (%)                                           | 52.4530        | 0.69527    |

Supplementary Table 2. Mutations predicted in PKD1/PKD2

| no.                                 | Gene Name | Exon/Intron | Type       | Codons     | cDNA change                   | Substitution | Share Number | Known/novel | Reference                        |
|-------------------------------------|-----------|-------------|------------|------------|-------------------------------|--------------|--------------|-------------|----------------------------------|
| <i>Definite pathogenic mutation</i> |           |             |            |            |                               |              |              |             |                                  |
| 1                                   | PKD2      | 14          | nonsense   | CGA2533TGA | c.2533C>T                     | R845*        | 2            | Novel       |                                  |
| 2                                   | PKD2      | 4           | nonsense   | CGA1081TGA | c.1081C>T                     | R361*        | 2            | Novel       |                                  |
| 3                                   | PKD2      | 4           | nonsense   | CGA958TGA  | c.958C>T                      | R320*        | 1            | Novel       |                                  |
| 4                                   | PKD1      | 6           | nonsense   | CAG1297TAG | c.1297C>T                     | Q433*        | 1            | Novel       |                                  |
| 5                                   | PKD1      | 7           | nonsense   | TGG1548TGA | c.1548G>A                     | W516*        | 2            | Novel       |                                  |
| 6                                   | PKD1      | 8           | frameshift |            | c.1686_1687insTG              |              | 1            | Novel       |                                  |
| 7                                   | PKD1      | 15          | frameshift |            | c.3300_3301insT               |              | 1            | Novel       |                                  |
| 8                                   | PKD1      | 15          | nonsense   | GAG3334TAG | c.3334G>T                     | E1112*       | 1            | Novel       |                                  |
| 9                                   | PKD1      | 15          | frameshift |            | c.4382_4383insC               |              | 1            | Novel       |                                  |
| 10                                  | PKD1      | 15          | frameshift |            | c.4493_4494insA               |              | 1            | Novel       |                                  |
| 11                                  | PKD1      | 15          | nonsense   | TCG4712TAG | c.4712C>A                     | S1571*       | 3            | Novel       |                                  |
| 12                                  | PKD1      | 15          | nonsense   | TGC5940TGA | c.5940C>A                     | C1980*       | 1            | Novel       |                                  |
| 13                                  | PKD1      | 15          | nonsense   | CAG6307TAG | c.6307C>T                     | Q2103*       | 1            | Known       | 10                               |
| 14                                  | PKD1      | 15          | nonsense   | CAG6472TAG | c.6472C>T                     | Q2158*       | 2            | Known       | 30                               |
| 15                                  | PKD1      | 15          | Indel      |            | c.6671_6672delGGCAGCGCCAGCCGC |              | 1            | Novel       |                                  |
| 16                                  | PKD1      | 15          | nonsense   | CAG6736TAG | c.6736C>T                     | Q2246*       | 1            | Known       | Athena Diagnostics (Unpublished) |

|                                            |      |              |                    |             |                         |        |   |       |       |
|--------------------------------------------|------|--------------|--------------------|-------------|-------------------------|--------|---|-------|-------|
| 17                                         | PKD1 | 18           | nonsense           | CGA7288TGA  | c.7288C>T               | R2430* | 1 | Known | 10,18 |
| 18                                         | PKD1 | 21           | nonsense           | CAG7987TAG  | c.7987C>T               | Q2663* | 1 | Known | 10    |
| 19                                         | PKD1 | 23           | Indel              |             |                         |        | 1 | Novel |       |
| 20                                         | PKD1 | 24           | nonsense           | CAG8905TAG  | c.8905C>T               | Q2969* | 2 | known | 10    |
| 21                                         | PKD1 | 24           | frameshift         |             | c.8692_8693insAACGGAGTT |        | 1 | Novel |       |
| 22                                         | PKD1 | 32           | frameshift         |             |                         |        | 1 | Novel |       |
| 23                                         | PKD1 | 33           | nonsense           | CAG10321TAG | c.10321C>T              | Q3441* | 1 | Novel |       |
| 24                                         | PKD1 | 34           | nonsense           | CAG10420TAG | c.10420C>T              | Q3474* | 1 | known | 30    |
| 25                                         | PKD1 | 35           | nonsense           | GAA10585TAA | c.10585G>T              | E3529* | 1 | Novel |       |
| 26                                         | PKD1 | 36           | frameshift         |             | c.10216_10217insA       |        | 1 | Novel |       |
| 27                                         | PKD1 | 40           | frameshift         |             | c.11331_11332delG       |        | 1 | Novel |       |
| 28                                         | PKD1 | Intron 41-42 | spliceAcceptorSite | -           | -                       | -      | 1 | Novel |       |
| 29                                         | PKD1 | 43           | frameshift         |             | c.11767_11768insCCAA    |        | 1 | Novel |       |
| 30                                         | PKD1 | 43           | nonsense           | CAG11935TAG | c.11935C>T              | Q3979* | 3 | known | 10    |
| 31                                         | PKD1 | 44           | nonsense           | CAG12124TAG | c.12124C>T              | Q4042* | 1 | known | 10    |
| 32                                         | PKD1 | Intron 44-45 | spliceDonorSite    | -           | -                       | -      | 1 | Novel |       |
| 33                                         | PKD1 | 46           | nonsense           | CAG12577TAG | c.12577C>T              | Q4193* | 1 | Novel |       |
| <b><i>Probably pathogenic mutation</i></b> |      |              |                    |             |                         |        |   |       |       |
| 1                                          | PKD2 | Intron 8-9   | spliceDonorSite    | -           | -                       | -      | 5 | Novel |       |
| 2                                          | PKD2 | 8            | missense           | TCG1760TTG  | c.1760C>T               | S587L  | 1 | Novel |       |
| 3                                          | PKD2 | 4            | missense           | CGG965CCG   | c.965G>C                | R322P  | 2 | Novel |       |

|    |      |              |                 |            |           |        |   |       |                                        |
|----|------|--------------|-----------------|------------|-----------|--------|---|-------|----------------------------------------|
| 4  | PKD1 | 6            | missense        | GCG1295GTG | c.1295C>T | A432V  | 1 | Known | 9                                      |
| 5  | PKD1 | Intron 8-9   | missense        | CGG1550CAG | c.1550G>A | R517Q  | 1 | Novel |                                        |
| 6  | PKD1 | 15           | missense        | ACG3344ATG | c.3344C>T | T1115M | 1 | Novel |                                        |
| 7  | PKD1 | 15           | missense        | GGG3490AGG | c.3490G>A | G1164R | 2 | Novel |                                        |
| 8  | PKD1 | 15           | missense        | GGG3955AGG | c.3955G>A | G1319R | 1 | Novel |                                        |
| 9  | PKD1 | 15           | missense        | CGC4090TGC | c.4090C>T | R1364C | 1 | Novel |                                        |
| 10 | PKD1 | 15           | missense        | GGC5855GAC | c.5855G>A | G1952D | 1 | Known | 15                                     |
| 11 | PKD1 | 15           | missense        | TCC6842TTC | c.6842C>T | S2281F | 1 | Novel |                                        |
| 12 | PKD1 | 15           | missense        | GAC6868TAC | c.6868G>T | D2290Y | 1 | Novel |                                        |
| 13 | PKD1 | 17           | missense        | TCC7100TTC | c.7100C>T | S2367F | 2 | Novel |                                        |
| 14 | PKD1 | 17           | missense        | GCC7130GTC | c.7130C>T | A2377V | 1 | Novel |                                        |
| 15 | PKD1 | 18           | missense        | TGC7483CGC | c.7483T>C | C2495R | 1 | Known | 10                                     |
| 16 | PKD1 | 23           | missense        | ATG8279AAG | c.8279T>A | M2760K | 1 | Novel |                                        |
| 17 | PKD1 | 23           | missense        | GAG8311AAG | c.8311G>A | E2771K | 1 | Known | 9                                      |
| 18 | PKD1 | 23           | missense        | GGC8353CGC | c.8353G>C | G2785R | 2 | Novel |                                        |
| 19 | PKD1 | 23           | missense        | TTC8558TCC | c.8558T>C | F2853S | 2 | known | 14                                     |
|    |      |              | missense        | ACG8780ATG | c.8780C>T | T2927M |   |       | Athena<br>Diagnostics<br>(Unpublished) |
| 20 | PKD1 | 23           |                 |            |           |        | 1 | known |                                        |
| 21 | PKD1 | Intron 24-25 | spliceDonorSite | -          | -         | -      | 1 | Novel |                                        |
| 22 | PKD1 | 25           | missense        | ACA9080AGA | c.9080C>G | T3027R | 1 | Novel |                                        |
| 23 | PKD1 | 27           | missense        | CGA9548CAA | c.9548G>A | R3183Q | 1 | Known | 18,25                                  |
| 24 | PKD1 | 28           | missense        | CCT9578CTT | c.9578C>T | P3193L | 1 | Known | 10                                     |
| 25 | PKD1 | 29           | missense        | CGT9763TGT | c.9763C>T | R3255C | 2 | Novel |                                        |
| 26 | PKD1 | Intron 36-37 | spliceSite      |            |           |        | 1 | Novel |                                        |
| 27 | PKD1 | Intron 37-38 | spliceDonorSite | -          | -         | -      | 1 | Novel |                                        |



|    |      |              |            |             |            |        |    |       |                                        |
|----|------|--------------|------------|-------------|------------|--------|----|-------|----------------------------------------|
| 28 | PKD1 | 39           | missense   | CGG11248TGG | c.11248C>T | R3750W | 4  | Novel |                                        |
| 29 | PKD1 | 39           | missense   | CGG11257TGG | c.11257C>T | R3753W | 2  | known | 9,10                                   |
| 30 | PKD1 | Intron 42-43 | spliceSite | -           | -          | -      | 1  | Novel |                                        |
| 31 | PKD1 | 46           | missense   | AAA12455ACA | c.12455A>C | K4152T | 1  | known | Athena<br>Diagnostics<br>(Unpublished) |
| 32 | PKD1 | 46           | missense   | TCC12569TTC | c.12569C>T | S4190F | 2  | known | 30                                     |
| 33 | PKD1 | 46           | 3-UTR      |             |            |        | 23 | Novel |                                        |
| 34 | PKD1 | 46           | 3-UTR      |             |            |        | 2  | Novel |                                        |

***Indeterminate mutation***

|    |      |    |          |            |           |        |   |       |    |
|----|------|----|----------|------------|-----------|--------|---|-------|----|
| 1  | PKD2 | 5  | missense | AGA1190AAA | c.1190G>A | R397K  | 2 | Novel |    |
| 2  | PKD1 | 10 | none     | GCC1910GTC | c.1910C>T | A637V  | 1 | Known | 31 |
| 3  | PKD1 | 10 | missense | GTT2068ATT | c.2068G>A | V690I  | 1 | Novel |    |
| 4  | PKD1 | 14 | missense | ATG3276ATC | c.3276G>C | M1092I | 2 | Novel |    |
| 5  | PKD1 | 15 | missense | TCG3548TGG | c.3548C>G | S1183W | 1 | Novel |    |
| 6  | PKD1 | 15 | missense | GTG3565ATG | c.3565G>A | V1189M | 1 | Novel |    |
| 7  | PKD1 | 15 | missense | GAT3613CAT | c.3613G>C | D1205H | 1 | Novel |    |
| 8  | PKD1 | 15 | missense | GTG3865ATG | c.3865G>A | V1289M | 1 | Novel |    |
| 9  | PKD1 | 15 | missense | CTG3868GTG | c.3868C>G | L1290V | 1 | known | 25 |
| 10 | PKD1 | 15 | missense | ACC4336CCC | c.4336A>C | T1446P | 5 | Novel |    |
| 11 | PKD1 | 15 | missense | ACC4541ATC | c.4541C>T | T1514I | 1 | Novel |    |
| 12 | PKD1 | 15 | missense | GTG4810ATG | c.4810G>A | V1604M | 1 | Known | 25 |
| 13 | PKD1 | 15 | missense | TCC5176ACC | c.5176T>A | S1726T | 1 | Novel |    |
| 14 | PKD1 | 15 | missense | GGC5770AGC | c.5770G>A | G1924S | 2 | Novel |    |
| 15 | PKD1 | 15 | missense | CAG6032CGG | c.6032A>G | Q2011R | 1 | Novel |    |
| 16 | PKD1 | 15 | missense | CGG6440CAG | c.6440G>A | R2147Q | 1 | Novel |    |

|    |      |              |                    |             |            |        |   |       |                                        |
|----|------|--------------|--------------------|-------------|------------|--------|---|-------|----------------------------------------|
| 17 | PKD1 | 15           | missense           | GCG6665GTG  | c.6665C>T  | A2222V | 4 | known | Athena<br>Diagnostics<br>(Unpublished) |
| 18 | PKD1 | 16           | missense           | GCG6935GTG  | c.6935C>T  | A2312V | 1 | known | Athena<br>Diagnostics<br>(Unpublished) |
| 19 | PKD1 | Intron 16-17 | spliceAcceptorSite | -           | -          | -      | 1 | Novel |                                        |
| 20 | PKD1 | Intron 16-17 | spliceSite         | -           | -          | -      | 2 | Novel |                                        |
| 21 | PKD1 | 17           | missense           | AGC7190AAC  | c.7190G>A  | S2397N | 1 | Known | Athena<br>Diagnostics<br>(Unpublished) |
| 22 | PKD1 | 22           | missense           | CAC8067CAG  | c.8067C>G  | H2689Q | 1 | Novel |                                        |
| 23 | PKD1 | 22           | missense           | CTC8087CGC  | c.8087T>G  | L2696R | 2 | Known | 25                                     |
| 24 | PKD1 | Intron 22-23 | spliceDonorSite    | -           | -          | -      | 1 | Novel |                                        |
| 25 | PKD1 | 23           | missense           | GAG8224AAG  | c.8224G>A  | E2742K | 1 | Known | 18                                     |
| 26 | PKD1 | 23           | missense           | CGC8300CAC  | c.8300G>A  | R2767H | 3 | Known | Athena<br>Diagnostics<br>(Unpublished) |
| 27 | PKD1 | 23           | missense           | GTG8302TTG  | c.8302G>T  | V2768L | 1 | Novel |                                        |
| 28 | PKD1 | 23           | missense           | GCC8671ACC  | c.8671G>A  | A2891T | 2 | Novel |                                        |
| 29 | PKD1 | 26           | missense           | GTG9256ATG  | c.9256G>A  | V3086M | 1 | Novel |                                        |
| 30 | PKD1 | 26           | missense           | TTC9331ATC  | c.9331T>A  | F3111I | 1 | Novel |                                        |
| 31 | PKD1 | Intron 28-29 | spliceSite         | -           | -          | -      | 1 | Novel |                                        |
| 32 | PKD1 | 29           | missense           | AAC9884AGC  | c.9884A>G  | N3295S | 1 | known | 25                                     |
| 33 | PKD1 | 31           | missense           | GAC10102AAC | c.10102G>A | D3368N | 2 | known | 24                                     |
| 34 | PKD1 | Intron 34-35 | spliceDonorSite    | -           | -          | -      | 2 | Novel |                                        |

|    |      |              |                 |             |            |        |    |       |
|----|------|--------------|-----------------|-------------|------------|--------|----|-------|
| 35 | PKD1 | Intron 34-35 | spliceDonorSite | -           | -          | -      | 2  | Novel |
| 36 | PKD1 | 36           | missense        | CTC10801TTC | c.10801C>T | L3601F | 1  | Novel |
| 37 | PKD1 | Intron 38-39 | spliceSite      | -           | -          | -      | 42 | Novel |
| 38 | PKD1 | 40           | missense        | ACC11333AAC | c.11333C>A | T3778N | 1  | known |
| 39 | PKD1 | Intron 14-42 | spliceSite      | -           | -          | -      | 1  | Novel |
| 40 | PKD1 | 42           | missense        | CGC11567CAC | c.11567G>A | R3856H | 2  | Novel |
| 41 | PKD1 | Intron 42-43 | spliceSite      | -           | -          | -      | 1  | Novel |

---

**Supplementary Table 3. Mutation detection and prediction in PKD1/PKD2**

|                              | PKD1       | PKD2     |
|------------------------------|------------|----------|
| Nonsense                     | 17         | 3        |
| Frameshift                   | 9          | 3        |
| Indel                        | 2          |          |
| Missense                     | 55         |          |
| SpliceSite                   | 16         | 1        |
| 3'-UTR                       | 2          |          |
| <b>Total</b>                 | <b>101</b> | <b>7</b> |
| Definite pathogenic mutation | 30         | 3        |
| Probably pathogenic mutation | 31         | 3        |
| Indeterminate mutation       | 40         | 1        |
| <b>Total</b>                 | <b>101</b> | <b>7</b> |

**Supplementary Table 4. Influence of PKD2 mutation on clinical phenotype**

| <b>Characteristic</b>                        | <b>PKD1 mutation (Indeterminate type)<br/>(n=49)</b> | <b>PKD1 mutation(Indeterminate type)+PKD2 mutation<br/>(n=6)</b> | <b>P Value</b> |
|----------------------------------------------|------------------------------------------------------|------------------------------------------------------------------|----------------|
| Sex (male/female)                            | 29/20                                                | 4/2                                                              | 0.767          |
| Age (yr)                                     | 44.98 ± 14.06                                        | 50.33 ± 11.81                                                    | 0.376          |
| Age at diagnosis (yr)                        | 37.14 ± 11.22                                        | 38.75 ± 0.50                                                     | 0.779          |
| Clear family history                         | 25 (52.1%)                                           | 5 (83.3%)                                                        | 0.204          |
| <b>Polycystic liver</b>                      | <b>16(33.3%)</b>                                     | <b>5 (83.3%)</b>                                                 | <b>0.026</b>   |
| hypertension                                 | 27(57.4%)                                            | 4 (66.7%)                                                        | 0.686          |
| Urologic complication                        | 28(58.3%)                                            | 5 (83.3%)                                                        | 0.384          |
| Born as the first child                      | 40(83.3%)                                            | 4 (66.7%)                                                        | 0.588          |
| BMI (kg/m <sup>2</sup> )                     | 22.40(21.22-25.71)                                   | 25.11(17.14-27.90)                                               | 0.293          |
| Hemoglobin (g/L)                             | 128.87 ± 19.75                                       | 139.80 ± 17.11                                                   | 0.253          |
| White blood cell count (*10 <sup>9</sup> /L) | 6.54 ± 2.18                                          | 6.02 ± 1.12                                                      | 0.604          |
| Platelet (*10 <sup>9</sup> /L)               | 225.48 ± 75.07                                       | 171.00 ± 29.18                                                   | 0.123          |
| Serum albumin (g/L)                          | 43.63 ± 5.42                                         | 42.52 ± 6.74                                                     | 0.686          |
| <b>Serum total protein (g/L)</b>             | <b>72.34 ± 5.85</b>                                  | <b>64.40 ± 5.34</b>                                              | <b>0.008</b>   |
| Serum creatinine (µmol/L)                    | 90.30(64.65-115.50)                                  | 79.10(59.85-150.90)                                              | 0.476          |
| Serum urea nitrogen (mmol/L)                 | 7.00(4.97-8.07)                                      | 5.45(3.33-9.74)                                                  | 0.365          |
| Serum uric acid (µmol/L)                     | 323.35 ± 111.34                                      | 309.60 ± 92.10                                                   | 0.794          |
| CysC (mg/L)                                  | 0.92(0.71-1.37)                                      | 1.09(0.76-2.16)                                                  | 0.505          |
| GFR (ml/min)                                 | 79.13(55.85-108.75)                                  | 93.75(48.17-110.77)                                              | 0.986          |
| Urine protein quantity (g/24h)               | 0.19(0.00-1.43)                                      | 0.13(0-1.22)                                                     | 0.884          |
| Kidney volume (mm <sup>3</sup> )             | 269.61(193.17-742.87)                                | 289.02(192.11-894.32)                                            | 0.102          |

BMI, Body Mass Index; eGFR, estimated Glomerular Filtration Rate

**Supplementary Table 5. Influence of mutation position in targeted regions on clinical phenotype of PKD1**

| <b>Characteristic</b>                        | <b>Position 1<br/>(n=15)</b> | <b>Position 2<br/>(n=22)</b> | <b>Position 3<br/>(n=18)</b> | <b>P<br/>Value</b> |
|----------------------------------------------|------------------------------|------------------------------|------------------------------|--------------------|
| Sex (male/female)                            | 8/7                          | 7/15                         | 8/10                         | 0.412              |
| Age (yr)                                     | 37.43±13.11                  | 43.11±13.11                  | 46.75±12.96                  | 0.140              |
| Age at diagnosis (yr)                        | 33.00±6.48                   | 33.31±8.93                   | 34.00±7.10                   | 0.949              |
| Clear family history                         | 8 (53.3%)                    | 11 (50.0%)                   | 8 (4.4%)                     | 0.873              |
| Polycystic liver                             | 5(33.3%)                     | 4(18.2%)                     | 6(33.3%)                     | 0.466              |
| hypertension                                 | 7(50.0%)                     | 10(45.5%)                    | 12(66.7%)                    | 0.388              |
| Urologic complication                        | 10(66.7%)                    | 9(40.9%)                     | 8(44.4%)                     | 0.273              |
| Born as the first child                      | 15(100%)                     | 18(81.8%)                    | 16(88.9%)                    | 0.219              |
| BMI (kg/m <sup>2</sup> )                     | 24.36(21.36-27.63)           | 22.03(21.26-22.80)           | 22.80(20.68-24.89)           | 0.308              |
| Hemoglobin (g/L)                             | 127.67±29.97                 | 131.08±14.02                 | 125.20±18.42                 | 0.774              |
| White blood cell count (*10 <sup>9</sup> /L) | 7.15±1.95                    | 5.58±1.47                    | 6.47±1.89                    | 0.137              |
| Platelet (*10 <sup>9</sup> /L)               | 209.67±82.48                 | 190.17±48.06                 | 239.00±103.71                | 0.381              |
| Serum albumin (g/L)                          | 45.80±3.42                   | 43.36±4.92                   | 44.13±5.46                   | 0.576              |
| Serum total protein (g/L)                    | 70.97±6.01                   | 70.45±5.69                   | 72.89±7.34                   | 0.720              |
| Serum creatinine (μmol/L)                    | 92.00(66.20-201.05)          | 80.00(56.83-129.95)          | 110.50(75.63-235.20)         | 0.253              |
| Serum urea nitrogen (mmol/L)                 | 8.64(5.39-9.88)              | 7.20(4.58-9.23)              | 7.47(6.75-14.44)             | 0.593              |
| Serum uric acid (μmol/L)                     | 350.36±106.99                | 334.68±121.22                | 318.88±133.52                | 0.815              |
| CysC (mg/L)                                  | 1.32(0.89-2.00)              | 0.86(0.65-1.56)              | 1.11(0.83-2.65)              | 0.520              |
| GFR (ml/min)                                 | 90.58(23.31-106.48)          | 89.21(44.16-116.68)          | 50.49(22.39-109.68)          | 0.329              |
| Urine protein quantity (g/24h)               | 0.10(0.05-0.45)              | 0.14(0.02-1.18)              | 0.58(0.05-1.31)              | 0.691              |
| Kidney volume (mm <sup>3</sup> )             | 563.11(112.44-936.54)        | 277.17(233.78-981.66)        | 326.71(178.22-853.26)        | 0.911              |

BMI, Body Mass Index; eGFR, estimated Glomerular Filtration Rate

**Supplementary Table 6. Influence of mutation pathogenic type on clinical phenotype of PKD1 (patients with single mutation)**

| Characteristic                               | Definite pathogenic<br>(n=15) | Probably pathogenic<br>(n=8) | Indeterminate<br>(n=32)           | P Value |
|----------------------------------------------|-------------------------------|------------------------------|-----------------------------------|---------|
| Sex (male/female)                            | 5/10                          | 2/7                          | 17/14                             | 0.040   |
| Age (yr)                                     | 42.17±8.87                    | 46.60±14.26                  | 42.25±14.18                       | 0.780   |
| Age at diagnosis (yr)                        | 34.67±5.54                    | 30.00±9.17                   | 33.46±8.03                        | 0.656   |
| Clear family history                         | 7 (46.7%)                     | 1 (12.5%)                    | 19 (59.4%)                        | 0.059   |
| Polycystic liver                             | 2(13.3%)                      | 2(25.0%)                     | 11(27.3%)                         | 0.316   |
| hypertension                                 | 5(33.3%)                      | 3(37.5%)                     | 21(67.7%)                         | 0.055   |
| Urologic complication                        | 6(40.0%)                      | 2(25.0%)                     | 19(59.4%)                         | 0.157   |
| Born as the first child                      | 14(93.3%)                     | 8(100%)                      | 27(84.4%)                         | 0.370   |
| BMI (kg/m <sup>2</sup> )                     | 22.59(20.50-24.85)            | 22.14(20.28-24.11)           | 22.21(21.39-25.31)                | 0.791   |
| Hemoglobin (g/L)                             | 129.25±22.55                  | 129.67±12.22                 | 127.71±19.43                      | 0.975   |
| White blood cell count (*10 <sup>9</sup> /L) | 5.78±1.60                     | 5.65±0.67                    | 6.61±1.98                         | 0.478   |
| Platelet (*10 <sup>9</sup> /L)               | 171.14±52.50                  | 173.33±44.99                 | 230.10±84.26                      | 0.159   |
| Serum albumin (g/L)                          | 44.02±3.05                    | 45.60±7.25                   | 44.50±5.37                        | 0.940   |
| Serum total protein (g/L)                    | 68.20±3.88                    | 70.65±10.39                  | 72.92±6.31                        | 0.065   |
| Serum creatinine (μmol/L)                    | 104.20(73.03-205.80)          | 136.40(103.00-229.80)        | 80.00(54.05-112.70) <sup>ab</sup> | 0.007   |
| Serum urea nitrogen (mmol/L)                 | 6.81(5.20-8.41)               | 8.14(6.30-10.00)             | 6.40(4.68-7.65) <sup>a</sup>      | 0.008   |
| Serum uric acid (μmol/L)                     | 333.12±118.70                 | 330.54±136.00                | 327.49±123.09                     | 0.992   |
| CysC (mg/L)                                  | 1.12(0.79-2.18)               | 1.25(0.61-1.56)              | 0.87(0.66-1.44) <sup>a</sup>      | 0.017   |
| Urine protein quantity (g/24h)               | 0.19(0.02-0.70)               | 0.13(0.06-0.20)              | 0.14(0-1.12)                      | 0.714   |
| eGFR (ml/min)                                | 62.00(26.91-91.91)            | 40.24(25.30-51.22)           | 90.58(49.75-117.03) <sup>ab</sup> | 0.022   |
| Kidney volume (mm <sup>3</sup> )             | 829.80(228.36-1285.42)        | 557.41(226.76-888.06)        | 276.11(198.94-482.11)             | 0.265   |

BMI, Body Mass Index; eGFR, estimated Glomerular Filtration Rate

<sup>a</sup> *P*<0.05 compared with group with definite pathogenic mutation

<sup>b</sup> *P*<0.05 compared with group with probably pathogenic mutation

**Supplementary Table 7. Influence of mutation pathogenic type on clinical phenotype of PKD1 (patients with single mutation)**

| Characteristic                               | Pathogenic<br>(n=23)   | Indeterminate<br>(n=32)      | Without variants<br>(n=21)         | P Value |
|----------------------------------------------|------------------------|------------------------------|------------------------------------|---------|
| Sex (male/female)                            | 6/17                   | 17/14                        | 11/10                              | 0.098   |
| Age (yr)                                     | 43.47±10.45            | 42.25±14.18                  | 40.24±11.58                        | 0.723   |
| Age at diagnosis (yr)                        | 33.50±6.49             | 33.46±8.03                   | 32.55±12.54                        | 0.956   |
| Clear family history                         | 8 (34.8%)              | 19 (59.4%)                   | 8 (38.1%)                          | 0.136   |
| Polycystic liver                             | 4(17.4%)               | 11(27.3%)                    | 5(23.8%)                           | 0.353   |
| hypertension                                 | 8(34.8%)               | 21(67.7%)                    | 1(52.4%)                           | 0.056   |
| Urologic complication                        | 8(34.8%)               | 19(59.4%)                    | 9(42.9%)                           | 0.175   |
| Born as the first child                      | 22(95.7%)              | 27(84.4%)                    | 18(85.7%)                          | 0.407   |
| BMI (kg/m <sup>2</sup> )                     | 22.54(20.52-24.93)     | 22.21(21.39-25.31)           | 23.09(20.38-24.85)                 | 0.772   |
| Hemoglobin (g/L)                             | 129.36±19.64           | 127.71±19.43                 | 135.09±10.94                       | 0.536   |
| White blood cell count (*10 <sup>9</sup> /L) | 5.74±1.35              | 6.61±1.98                    | 5.93±1.05                          | 0.321   |
| Platelet (*10 <sup>9</sup> /L)               | 171.80±47.84           | 230.10±84.26                 | 192.20±59.05                       | 0.096   |
| Serum albumin (g/L)                          | 44.18±3.26             | 44.50±5.37                   | 46.42±5.28                         | 0.551   |
| Serum total protein (g/L)                    | 68.20±3.88             | 72.92±6.31                   | 74.66±3.65 <sup>a</sup>            | 0.043   |
| Serum creatinine (μmol/L)                    | 173.88(81.40-239.35)   | 80.00(54.05-112.70)          | 57.55(53.50-101.55) <sup>a</sup>   | 0.001   |
| Serum urea nitrogen (mmol/L)                 | 8.96(7.36-14.44)       | 6.40(4.68-7.65) <sup>a</sup> | 5.03(3.82-6.99) <sup>a</sup>       | 0.002   |
| Serum uric acid (μmol/L)                     | 332.12±121.72          | 327.49±123.09                | 303.17±133.22                      | 0.798   |
| CysC (mg/L)                                  | 1.56(0.88-2.66)        | 0.87(0.66-1.44) <sup>a</sup> | 0.66(0.53-1.23) <sup>a</sup>       | 0.011   |
| GFR (ml/min)                                 | 35.08(20.25-103.87)    | 90.58(49.75-117.03)          | 102.72(72.80-126.90) <sup>a</sup>  | 0.005   |
| Urine protein quantity (g/24h)               | 0.19(0.07-0.70)        | 0.14(0-1.12)                 | 0.15(0.00-0.60)                    | 0.619   |
| Kidney volume (mm <sup>3</sup> )             | 864.11(592.92-1677.72) | 276.11(198.94-482.11)        | 188.19(113.68-353.69) <sup>a</sup> | 0.102   |

BMI, Body Mass Index; eGFR, estimated Glomerular Filtration Rate

<sup>a</sup> *P*<0.05 compared with group with pathogenic mutation



### **Supplementary Figure 1. Schematic diagram for the Next Generation Sequencing**

A custom capture array (NimbleGen, Roche) was designed to capture the exons, splice sites and the immediately adjacent intron sequences of targeted genes (PKD1 and PKD2). The qualified genomic DNA sample was then fragmented using AFA (Adaptive Focused Acoustics™) technology on Covaris S220 Focused-ultrasonicators, and the sizes of the library fragments were primarily distributed between 250 bp and 300 bp. Adapters were then ligated to both ends of the resulting fragments. Extracted DNA was then amplified by ligation-mediated PCR (LM-PCR), purified, and hybridized to the Nimblegen SeqCap EZ Library for enrichment; non-hybridized fragments were then washed out. Both non-captured and captured LM-PCR products were subjected to quantitative PCR to estimate the magnitude of enrichment. Each captured library was then loaded on a HiSeq2000 platform, and we performed high-throughput sequencing for each captured library to ensure that each sample met the desired average sequencing depth. Raw image files were processed using the Illumina basecalling Software 1.7 for base-calling with default parameters, and the sequences of each individual were generated as 90 bp pair-end reads. SOAPaligner/SOAP2 was used to map reads onto the reference, whereas BWA was used to map reads to the reference when analysing indels. The information of BWA can be found at <http://bio-bwa.sourceforge.net/>. The variations identified with NGS were validated by using classic Sanger sequencing. The standard nomenclature recommended by HGVS (<http://www.hgvs.org/mutnomen/>) was used to name the variations.

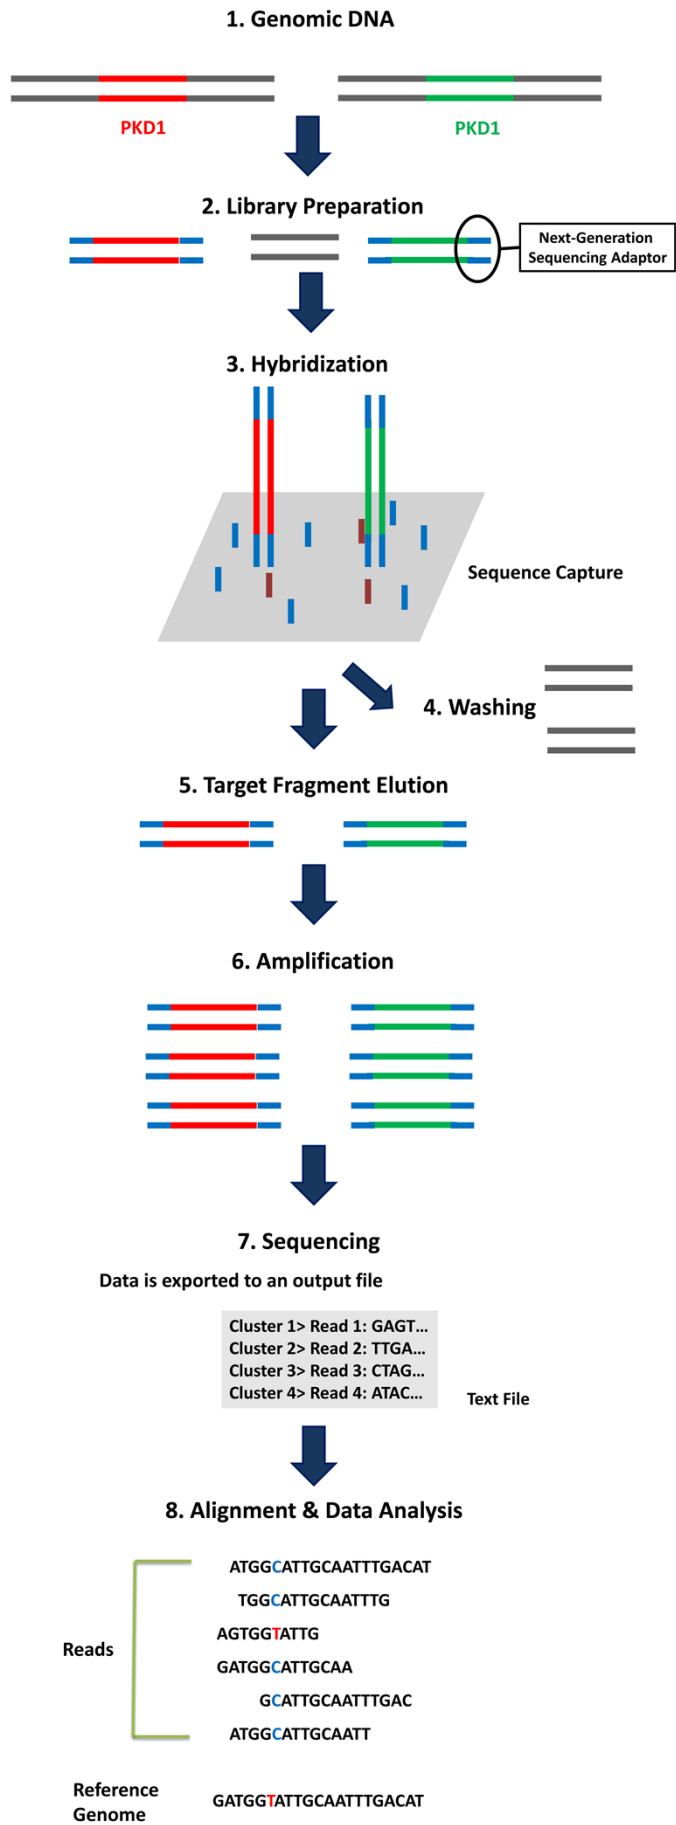

Supplementary Figure 1. Schematic diagram for the Next Generation Sequencing
